# Supplementary material for: Synthesis of a covalently linked bismuthene–graphene heterostructure loaded with mitomycin C for combined radio-thermo-chemotherapy of triple-negative breast cancer
Source: Royal Society of Chemistry journal article supplement (doi:10.1039/d5tb00096c), 2025-01-01
Supplement: d5tb00096c1.pdf [file d5tb00096c1.pdf]

### Supplementary data

## Synthesis of Covalently Linked Bismuthene-Graphene Heterostructure Loaded with Mitomycin C for Combined Radio-thermo-chemotherapy of Triple-Negative Breast Cancer

Mohammad Varzandeh, Minoo Karbasi, Sheyda Labbaf, Jaleh Varshosaz, Nafiseh Esmail, Reza Birang

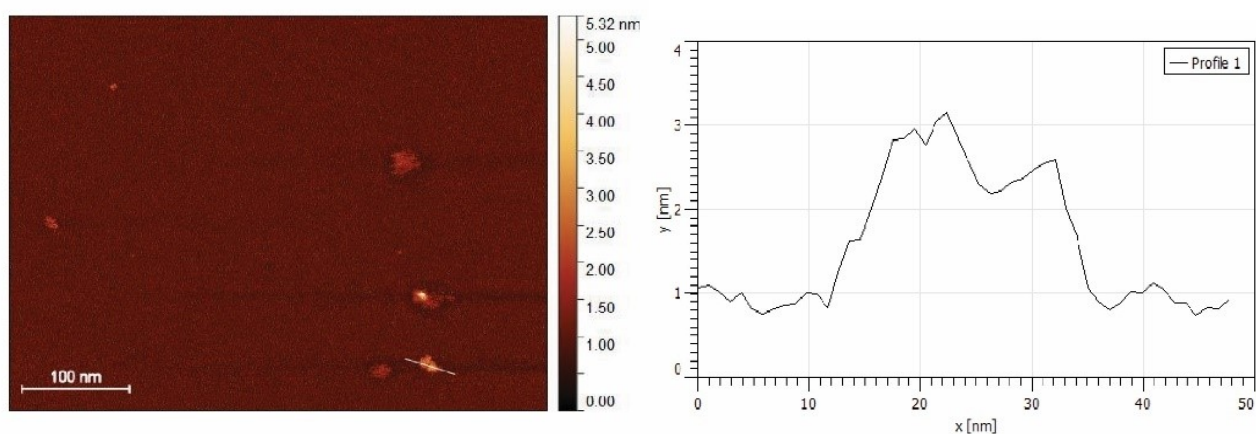

**Figure S1.** FTIR image of BiNS-rGO and related height profile

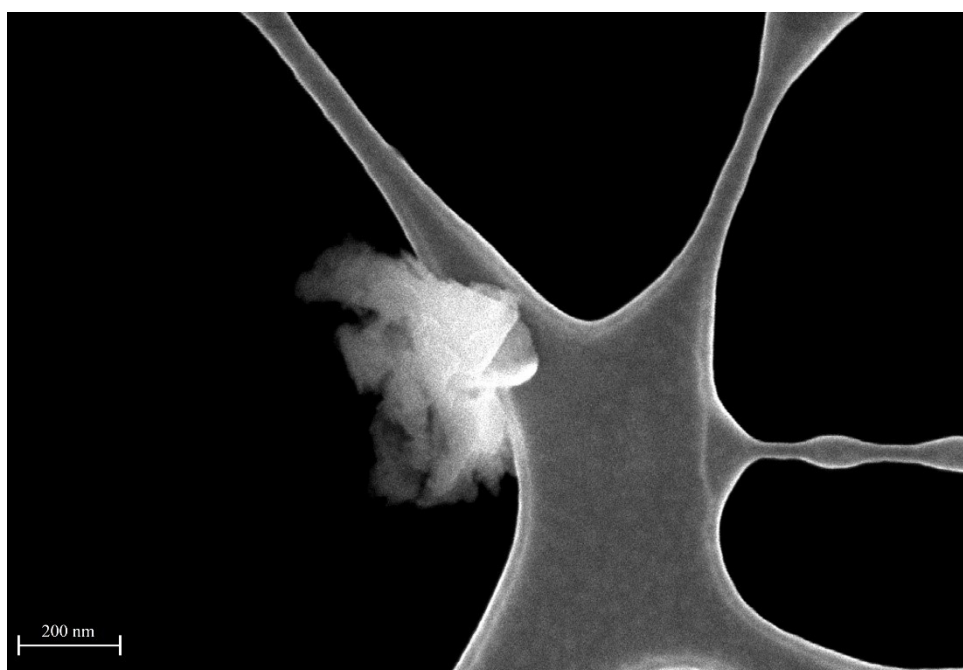

**Figure S2.** STEM image of BiNS-rGO

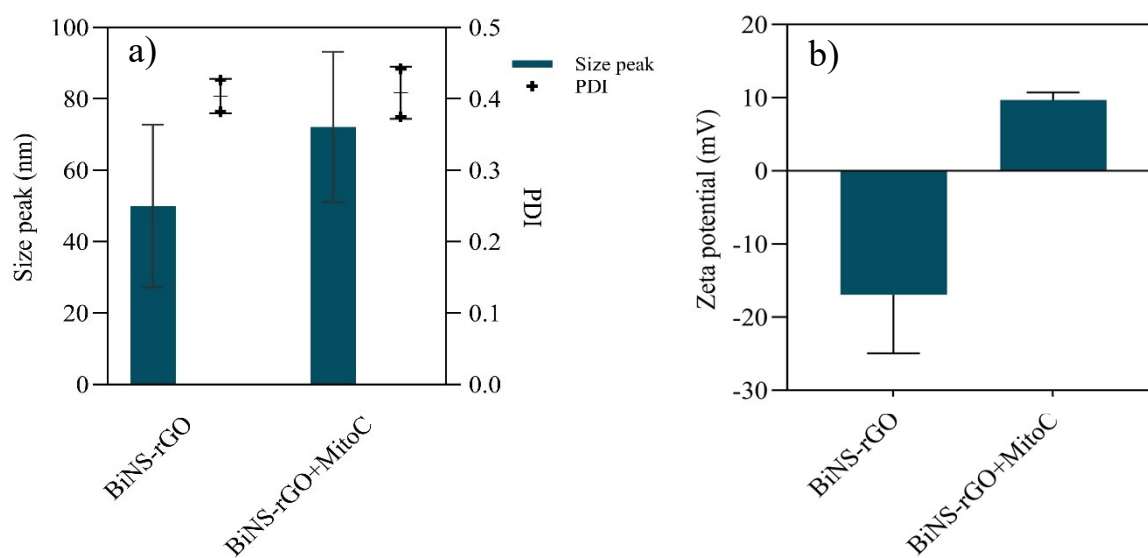

**Figure S3.** a) DLS size peak and PDI; b) zeta potential of BiNS-rGO and BiNS-rGO-MitoC
